# Supplementary material for: Carbon emission reduction strategy planning and scheduling for transitioning process plants towards net-zero emissions
Source: Royal Society of Chemistry journal article supplement (doi:10.1039/d4su00636d), 2024-12-18
Supplement: d4su00636d1.pdf [file d4su00636d1.pdf]

## Supplementary Information

### Case Study 1:

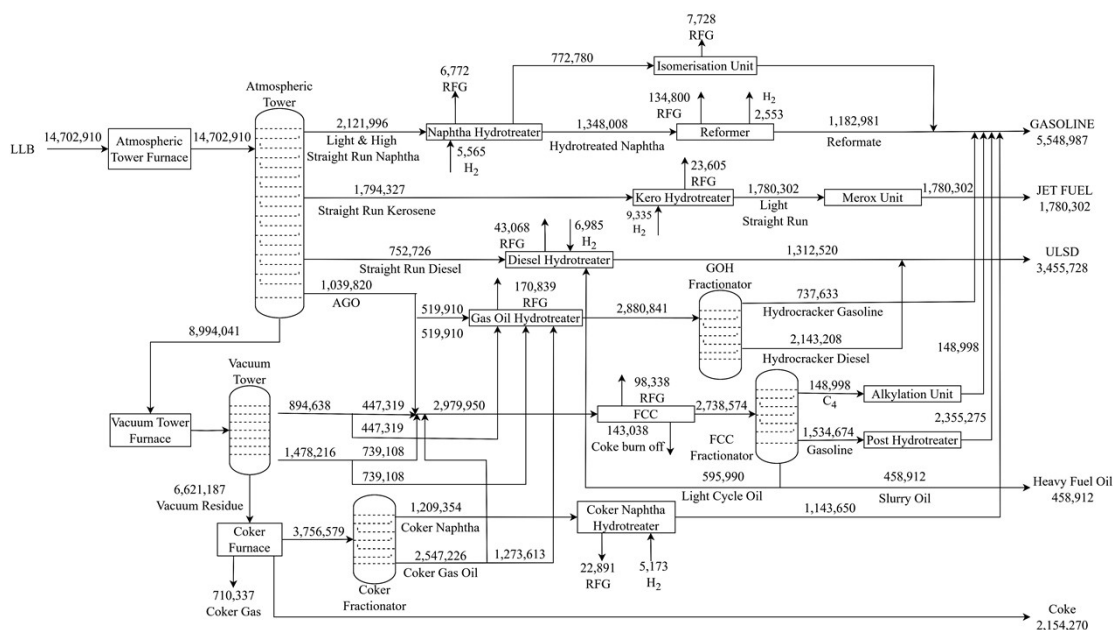

Figure S1: Process flow in a traditional deep configuration refinery (Reproduced from Bhuiyan, *et al.*<sup>26</sup> with permissions)

Table S1: Economic factor and carbon intensity of utilities

| Utility       | Economic Factor | Unit    | Source                      | Carbon Factor | Unit                  | Source                      |
|---------------|-----------------|---------|-----------------------------|---------------|-----------------------|-----------------------------|
| Electricity   | 0.10            | USD/kWh | Yap,                        | 184.8         | g CO <sub>2</sub> /MJ |                             |
| Steam         | 0.012           | USD/kg  | <i>et al.</i> <sup>20</sup> | 75.4          | g CO <sub>2</sub> /MJ | Abella,                     |
| Natural Gas   | 0.0027          | USD/MJ  | Bhuiyan,                    | 69.2          | g CO <sub>2</sub> /MJ | <i>et al.</i> <sup>27</sup> |
| Hydrogen      | 0.0034          | USD/MJ  | <i>et al.</i> <sup>26</sup> | 81.7          | g CO <sub>2</sub> /MJ |                             |
| Cooling Water | 0.00054         | USD/MJ  | Yap,                        | 77.7          | g CO <sub>2</sub> /MJ | Yap,                        |
|               |                 |         | <i>et al.</i> <sup>20</sup> |               |                       | <i>et al.</i> <sup>20</sup> |
| Refrigerant   | 0.79            | USD/MJ  | Daikin <sup>28</sup>        | 11.96         | g CO <sub>2</sub> /MJ | Daikin <sup>28</sup>        |

Table S2: Refinery process shared and dedicated facilities

| Shared facility                                     | Dedicated facility                         |
|-----------------------------------------------------|--------------------------------------------|
| Desalter                                            | Naphtha hydrotreater                       |
| Atmospheric tower                                   | Coker naphtha hydrotreater                 |
| Vacuum tower and furnace                            | Fluid catalytic cracking post hydrotreater |
| Gas oil hydrotreater (GOH) and fractionator         | Alkylation unit                            |
| Coker furnace and fractionator                      | Catalytic naphtha reformer                 |
| Coker                                               | Isomerisation unit                         |
| Fluid catalytic cracker (FCC) and main fractionator | Kerosene hydrotreater and merox unit       |
| Fuel gas treatment and sulphur recovery             | Diesel hydrotreater                        |

Table S3: Refinery process energy inputs and outputs

| Process Unit                               | Process Energy Inputs and Outputs |                                |                                 |                               |                                      |                               |
|--------------------------------------------|-----------------------------------|--------------------------------|---------------------------------|-------------------------------|--------------------------------------|-------------------------------|
|                                            | Input                             |                                |                                 |                               |                                      | Output                        |
|                                            | Power consumption<br>MJ/day       | Total NG requirement<br>kg/day | Medium-pressure steam<br>kg/day | High-pressure steam<br>kg/day | Total hydrogen requirement<br>kg/day | Hydrogen production<br>kg/day |
| Desalter                                   | 5,402                             | -                              | -                               | -                             | -                                    | -                             |
| Atmospheric Tower Furnace                  | -                                 | 6,228,841                      | -                               | -                             | -                                    | -                             |
| Atmospheric Tower                          | 324,113                           | -                              | 319,719                         | -                             | -                                    | -                             |
| Vacuum Tower Furnace                       | -                                 | 2,183,895                      | -                               | -                             | -                                    | -                             |
| Vacuum Tower                               | 59,754                            | -                              | 286,420                         | -                             | -                                    | -                             |
| Naphtha Hydrotreater                       | 124,253                           | 1,692,457                      | 41,748                          | -                             | 5,844                                | -                             |
| Kerosene Hydrotreater                      | 141,396                           | 1,902,060                      | -                               | 47,508                        | 9,802                                | -                             |
| Kerosene Merox Unit                        | 4,915                             | -                              | -                               | -                             | -                                    | -                             |
| Gas Oil Hydrocracker                       | 457,528                           | -                              | -                               | -                             | 93,925                               | -                             |
| Gas Oil Hydrocracker Fractionator          | 129,732                           | -                              | -                               | 539,947                       | -                                    | -                             |
| Diesel Hydrotreater                        | 103,984                           | 1,396,090                      | -                               | 34,938                        | 7,334                                | -                             |
| Coker Furnace                              | -                                 | 5,894,084                      | -                               | -                             | -                                    | -                             |
| Coker                                      | 232,661                           | -                              | -                               | -                             | -                                    | -                             |
| Coker Fractionator                         | 48,658                            | -                              | 41,123                          | -                             | -                                    | -                             |
| Coker Naphtha Hydrotreater                 | 106,690                           | 1,448,511                      | -                               | 35,847                        | 5,432                                | -                             |
| Fluid Catalytic Cracking Post Hydrotreater | 93,919                            | 1,227,098                      | 35,501                          | -                             | 4,232                                | -                             |
| Fluid Catalytic Cracker                    | 50,042                            | -                              | -                               | -                             | -                                    | -                             |
| Fluid Catalytic Cracker Main Fractionator  | 35,335                            | -                              | 10,144                          | -                             | -                                    | -                             |
| Alkylation Unit                            | 22,240                            | -                              | 109,800                         | -                             | -                                    | -                             |
| Catalytic Naphtha Reformer                 | 124,918                           | -                              | -                               | 157,394                       | -                                    | 30,226                        |
| Isomerisation Unit                         | 27,492                            | 1,223,476                      | -                               | -                             | 43                                   | -                             |
| Fuel gas treatment and sulphur recovery    | 201,960                           | 2,749,997                      | -                               | -766,690                      | -                                    | -                             |
| <b>Total</b>                               | <b>2,294,995</b>                  | <b>25,946,509</b>              | <b>844,455</b>                  | <b>48,945</b>                 | <b>126,611</b>                       | <b>30,226</b>                 |

Table S4: Refinery process CO<sub>2</sub> emissions

| Process Unit                               | Process CO <sub>2</sub> Emissions |                          |                          |                          |                            |
|--------------------------------------------|-----------------------------------|--------------------------|--------------------------|--------------------------|----------------------------|
|                                            |                                   |                          | Input                    |                          |                            |
|                                            | Power consumption                 | Total NG requirement     | Medium-pressure steam    | High-pressure steam      | Total hydrogen requirement |
|                                            | t CO <sub>2eq</sub> /day          | t CO <sub>2eq</sub> /day | t CO <sub>2eq</sub> /day | t CO <sub>2eq</sub> /day | t CO <sub>2eq</sub> /day   |
| Desalter                                   | 1.00                              | -                        | -                        | -                        | -                          |
| Atmospheric Tower Furnace                  | -                                 | 431.04                   | -                        | -                        | -                          |
| Atmospheric Tower                          | 59.90                             | -                        | 67.02                    | -                        | -                          |
| Vacuum Tower Furnace                       | -                                 | 151.13                   | -                        | -                        | -                          |
| Vacuum Tower                               | 11.04                             | -                        | 60.04                    | -                        | -                          |
| Naphtha Hydrotreater                       | 22.96                             | 117.12                   | 8.75                     | -                        | 60.66                      |
| Kerosene Hydrotreater                      | 26.13                             | 131.62                   | -                        | 11.68                    | 101.75                     |
| Kerosene Merox Unit                        | 0.91                              | -                        | -                        | -                        | -                          |
| Gas Oil Hydrocracker                       | 84.55                             | -                        | -                        | -                        | 975.01                     |
| Gas Oil Hydrocracker Fractionator          | 23.97                             | -                        | -                        | 132.72                   | -                          |
| Diesel Hydrotreater                        | 19.22                             | 96.61                    | -                        | 8.59                     | 76.13                      |
| Coker Furnace                              | -                                 | 407.87                   | -                        | -                        | -                          |
| Coker                                      | 43.00                             | -                        | -                        | -                        | -                          |
| Coker Fractionator                         | 8.99                              | -                        | 8.62                     | -                        | -                          |
| Coker Naphtha Hydrotreater                 | 19.72                             | 100.24                   | -                        | 8.81                     | 56.39                      |
| Fluid Catalytic Cracking Post Hydrotreater | 17.36                             | 84.92                    | 7.44                     | -                        | 43.93                      |
| Fluid Catalytic Cracker                    | 9.25                              | -                        | -                        | -                        | -                          |
| Fluid Catalytic Cracker Main Fractionator  | 6.53                              | -                        | 2.13                     | -                        | -                          |
| Alkylation Unit                            | 4.11                              | -                        | 23.02                    | -                        | -                          |
| Catalytic Naphtha Reformer                 | 23.08                             | -                        | -                        | 38.69                    | -                          |
| Isomerisation Unit                         | 5.08                              | 84.66                    | -                        | -                        | 0.44                       |
| Fuel gas treatment and sulphur recovery    | 37.32                             | 190.30                   | -                        | -188.46                  | 43.93                      |
| Total                                      | 424.12                            | 1,795.50                 | 177.01                   | 12.03                    | 1,314.32                   |

### Strategy 1 – Natural gas combined heat and power (NG CHP)

From Table 4, the total electric needed is 2,294,995 MJ,

$$\text{Power required} = 2,294,995 \text{ MJ} \times \frac{1.1574 \times 10^{-5} \text{ MW}}{1 \text{ MJ}} = 26.56 \text{ MW}$$

For NG CHP system, the heat available by generation of electrical. From Table A2, the power-to-heat ratio of the NG – CHP is 1.1,

$$\text{Heat available} = 26.56 \text{ MW} \div 1.1 = 24.15 \text{ MW}$$

The heat is then used to produce medium - pressure (MP) steam for the process. From Table A1 the heating value of MP steam is taken as 2.78 MJ/kg,

$$\begin{aligned} \text{MP steam produce, } D_{\text{MP steam}} &= 24.15 \text{ MW} \times \frac{1 \text{ MJ}}{1.1574 \times 10^{-5} \text{ MW}} \\ &= 2,086,573 \text{ MJ} \div 2.78 \frac{\text{MJ}}{\text{kg}} = 750,566 \text{ kg steam} \end{aligned}$$

NG CHP system with the efficiency of 69%,

$$\text{Total fuel required} = (26.56 + 24.15) \text{ MW} \div 0.69 = 73.49 \text{ MW}$$

$$\begin{aligned} \text{NG required} &= 73.49 \text{ MW} \times \frac{1 \text{ MJ}}{1.1574 \times 10^{-5} \text{ MW}} \\ &= 6,349,577 \text{ MJ} \div 47.14 \frac{\text{MJ}}{\text{kg}} = 134,696 \text{ kg NG} \end{aligned}$$

From Table 2, the NG utility cost on 0.00265 USD/MJ NG,

$$\text{Cost of NG} = 6,349,577 \text{ MJ NG} \times 0.00265 \frac{\text{USD}}{\text{MJ NG}} = 16,826 \text{ USD}$$

The produced electric and steam by the NG CHP system act as the saving cost from buying fresh utilities. From Table 2, the utility cost of electric and steam is 0.028 USD/MJ electric and 0.012 USD/kg steam,

$$\begin{aligned} \text{Saving cost} &= \text{Electric utility} \& \text{ Steam utility} \\ &= \left( 2,294,995 \text{ MJ} \times 0.028 \frac{\text{USD}}{\text{MJ electric}} \right) + \left( 750,566 \text{ kg} \times 0.012 \frac{\text{USD}}{\text{kg steam}} \right) = 73,267 \text{ USD} \end{aligned}$$

$$\begin{aligned} \text{Total saving cost} &= \text{Saving cost} - \text{Cost of NG} \\ &= (73,267 - 16,826) \text{ USD} = 56,441 \text{ USD} \end{aligned}$$

The emissions from NG CHP system are the use of natural gas. From Table 2, the emissions factor of NG is 69.3 g CO<sub>2</sub>/MJ NG,

$$\text{NG emissions} = 6,349,577 \text{ MJ NG} \times 69.2 \frac{\text{g CO}_2}{\text{MJ NG}} = 439,390,728 \text{ g CO}_2$$

The electricity and steam produced by the NG CHP system reduces the indirect emissions. From Table 2, the emissions factor of electric and steam is 184.8 g CO<sub>2</sub>/MJ electric and 75.4 g CO<sub>2</sub>/MJ steam,

$$\begin{aligned} \text{Reduction emissions} &= \text{Electric utility} \& \text{ Steam utility} \\ &= \left( 2,294,995 \text{ MJ electric} \times 184.8 \frac{\text{g CO}_2}{\text{MJ electric}} \right) + \left( 2,086,573 \text{ MJ steam} \times 75.4 \frac{\text{g CO}_2}{\text{MJ steam}} \right) \\ &= 581,442,680 \text{ g CO}_2 \end{aligned}$$

$$\begin{aligned} \text{Total reduction emissions} &= \text{Reduction emissions} - \text{NG emissions} \\ &= (581,442,680 - 439,390,728) \text{ g CO}_2 \times \frac{1 \text{ t}}{10 \times 10^6 \text{ g}} \\ &= 142.05 \text{ t CO}_2 \end{aligned}$$

Follow to EPA<sup>1</sup> the average total installed cost of gas turbine is 859 USD/kW. With the required gas turbine capacity of 26.56 MW,

$$\begin{aligned} \text{Total installed cost} &= 26.56 \text{ MW} \times \frac{1000 \text{ kW}}{1 \text{ MW}} \times 859 \frac{\text{USD}}{\text{kW}} \\ &= 22,815,040 \text{ USD} \end{aligned}$$

As the cost is in year of 2002, with the Chemical Engineering Plant Cost Index (CEPCI) of 395.6 and take CE index of 789.2 on year 2023.<sup>2</sup> The actual total installed cost can be calculated by using formula below,<sup>3</sup>

$$\begin{aligned} \text{Cost in year A} &= \text{Cost in year B} \times \left( \frac{\text{CEPCI in year A}}{\text{CEPCI in year B}} \right) \\ \text{Total installed cost}_{2023} &= 22,815,040 \text{ USD} \times \left( \frac{789.2}{395.6} \right) = 45,514,736 \text{ USD} \end{aligned}$$

The total installed cost is then converted to annualised capital cost (CAPEX) with multiply the annual capital charge ratio (ACCR). This can be calculated by the formula below,<sup>3</sup>

$$\text{ACCR} = \frac{DR}{1 - (1 + DR)^{-n}}$$

where, *DR* is the interest rate, assume 20% in this case and *n* is the years of compound interest, assume the plant life of 20 years,

$$\text{ACCR} = \frac{0.20}{1 - (1 + 0.20)^{-20}} = 0.21$$

$$\begin{aligned} \text{CAPEX} &= \text{ACCR} \times \text{Total installed cost} \\ &= 0.21 \times 45,514,736 \text{ USD} = 9,558,095 \text{ USD/yr} \end{aligned}$$

The annual capital charge can be added to the operating costs to give a total annualised cost (TAC) with taken the plant operates in 334 days a year,

$$\begin{aligned} \text{TAC} &= \text{CAPEX} + \text{Operating costs} \\ &= 9,558,095 \frac{\text{USD}}{\text{yr}} + (16,826-73,267) \frac{\text{USD}}{\text{day}} \times \frac{334 \text{ day}}{1 \text{ yr}} = 9,293,199 \frac{\text{USD}}{\text{yr}} \end{aligned}$$



## Strategy 2 – Biomass combined heat and power (CHP)

From Table 4, the total MP and HP steam needed is 844,455 kg/day and 48,945 kg/day, respectively. With their heating value as shown in Table A1,

$$\begin{aligned} \text{Steam required, } D_{\text{steam}} &= 844,455 \text{ kg} \times 2.78 \frac{\text{MJ}}{\text{kg}} + 48,945 \text{ kg} \times 3.26 \frac{\text{MJ}}{\text{kg}} \\ &= 2,507,147 \text{ MJ} \times \frac{1.1574 \times 10^{-5} \text{ MW}}{1 \text{ MJ}} = 29.02 \text{ MW} \end{aligned}$$

For Biomass CHP system, the electricity is generated by steam turbines. From Table A2, the power-to-heat ratio of the biomass CHP is 0.13,

$$\begin{aligned} \text{Power produced, } D_{\text{power}} &= 29.02 \text{ MW} \times 0.13 \\ &= 3.77 \text{ MW} \times \frac{1 \text{ MJ}}{1.1574 \times 10^{-5} \text{ MW}} = 325,929 \text{ MJ} \end{aligned}$$

Biomass CHP system with the efficiency of 79.6%,

$$\text{Actual fuel needed} = (29.02 + 3.77) \text{ MW} \div 0.796 = 41.19 \text{ MW}$$

$$\text{Biomass required} = 41.19 \text{ MW} \times \frac{1 \text{ MJ}}{1.1574 \times 10^{-5} \text{ MW}} \div 16.14 \frac{\text{MJ}}{\text{kg}} = 220,498 \text{ kg biomass}$$

The biomass utility cost on 0.05 USD/kg biomass Susanto *et al.*,<sup>4</sup>

$$\text{Cost of biomass} = 220,498 \text{ kg biomass} \times 0.05 \frac{\text{USD}}{\text{kg biomass}} = 11,025 \text{ USD}$$

$$\begin{aligned} \text{Saving cost} &= \left( 325,929 \text{ MJ} \times 0.028 \frac{\text{USD}}{\text{MJ electric}} \right) + \left( 893,400 \text{ kg} \times 0.012 \frac{\text{USD}}{\text{kg steam}} \right) \\ &= 19,847 \text{ USD} \end{aligned}$$

$$\text{Total saving cost} = (19,847 - 11,025) \text{ USD} = 8,822 \text{ USD}$$

Since the use of renewable sources of biomass, the emissions can be neglected.

$$\begin{aligned} \text{Total reduction emissions} &= \text{Electric produce} + \text{Steam produce} \\ &= \left( 325,955 \text{ MJ} \times 184.8 \frac{\text{g CO}_2}{\text{MJ electric}} \right) + \left( 2,507,147 \text{ MJ} \times 75.4 \frac{\text{g CO}_2}{\text{MJ steam}} \right) \\ &= 249,275,368 \text{ g CO}_2 \times \frac{1 \text{ t}}{10 \times 10^6 \text{ g}} = 249.28 \text{ t CO}_2 \end{aligned}$$

The capital cost of biomass CHP system includes the biomass prepare costs, and steam turbine and boiler installed costs. Follow to EPA,<sup>5,6</sup> the preparation cost of biomass and installed cost of steam turbine is 5,430,000 USD and 1,136 USD/kW, respectively. With the required steam turbine capacity of 3.77 MW,

$$\text{Cost of preparation}_{2015} = 5,430,000 \text{ USD}$$

$$\text{Cost of preparation}_{2023} = 5,430,000 \text{ USD} \times \left( \frac{789.2}{556.8} \right) = 7,696,401 \text{ USD}$$

$$\text{Cost of steam turbine}_{2017} = 3.77 \text{ MW} \times \frac{1000 \text{ kW}}{1 \text{ MW}} \times 1,136 \frac{\text{USD}}{\text{kW}}$$

$$\text{Cost of steam turbine}_{2023} = 4,282,720 \text{ USD} \times \left(\frac{789.2}{567.5}\right) = 5,955,811 \text{ USD}$$

Installed cost of boiler can be calculated by equation below Towler and Sinnott,<sup>7</sup>

$$C_e = a + bS^n$$

Where,  $C_e$  = purchased equipment cost

$a, b$  = cost constants

$S$  = size parameter

$n$  = exponent for that type of equipment

Followed to Towler and Sinnott,<sup>7</sup> the boiler  $a$  is 124,000,  $b$  is 10.0,  $n$  is 1 and the required size is 893,400 kg/day with CEPCI index of 532.9,

$$C_{e,boiler} = 124,000 + 10\left(893,400 \frac{\text{kg}}{\text{day}} \times \frac{1 \text{ day}}{24 \text{ hr}}\right)^1 = 496,250 \text{ USD}$$

The fixed capital cost is calculated by multiple with the installation factors as shown below Towler and Sinnott,<sup>7</sup>

$$C = \sum_{i=1}^{i=M} C_{e,i,A} [(1 + f_p) + (f_{er} + f_{el} + f_i + f_c + f_s + f_l)/f_m]$$

where,  $C_{e,i,A}$  = purchased equipment cost of equipment  $i$  in alloy

$M$  = total number of pieces of equipment

$f_p$  = installation factor for piping

$f_{er}$  = installation factor for equipment erection

$f_{el}$  = installation factor for electrical work

$f_i$  = installation factor for instrumentation and process control

$f_c$  = installation factor for civil engineering work

$f_s$  = installation factor for structures and buildings

$f_l$  = installation factor for lagging, insulation, or paint

Taken the factor from Towler and Sinnott (Table 7.5),<sup>7</sup>

$$C_{boiler} = 496,250 \text{ USD} [(1 + 0.2) + (0.6 + 0.2 + 0.15 + 0.2 + 0.1 + 0.05)/1] \\ = 1,240,625 \text{ USD}$$

$$\text{Cost of boiler}_{2023} = 1,240,625 \text{ USD} \times \left(\frac{789.2}{532.9}\right) = 1,837,308 \text{ USD}$$

$$\text{Total capital cost} = \text{Cost of preparation} + \text{Steam turbine} + \text{Boiler} \\ = (7,696,401 + 5,955,811 + 1,837,308) \text{ USD} = 15,489,520 \text{ USD}$$

$$\text{CAPEX} = 0.21 \times 15,489,520 \text{ USD} = 3,252,799 \frac{\text{USD}}{\text{yr}}$$

$$\text{TAC} = 3,252,799 \frac{\text{USD}}{\text{yr}} + (11,025 - 19,847) \frac{\text{USD}}{\text{day}} \times \frac{334 \text{ day}}{1 \text{ yr}} = 306,251 \frac{\text{USD}}{\text{yr}}$$



### Strategy 3 – Recycled hydrogen

From Table 2, the hydrogen produced by the process is 30,226 kg. A compressor is needed for recycled and poses of CO<sub>2</sub> emissions from the used of power. Followed to Richardson *et al.*<sup>8</sup> typical compressor consumes average of 3 kWh/kg of electricity,

$$\text{Electric needed, } D_{\text{electric}} = 30,226 \text{ kg} \times 3 \frac{\text{kWh}}{\text{kg}} = 90,678 \text{ kWh}$$

$$\text{Electric cost} = 90,678 \text{ kWh} \times \frac{3.6 \text{ MJ}}{1 \text{ kWh}} \times 0.028 \frac{\text{USD}}{\text{MJ electric}} = 9,068 \text{ USD}$$

$$\text{Electric emission} = 90,678 \text{ kWh} \times \frac{3.6 \text{ MJ}}{1 \text{ kWh}} \times 184.8 \frac{\text{g CO}_2}{\text{MJ}} = 60,326,260 \text{ g CO}_2$$

$$\text{Reduction emissions} = 3,840,516 \text{ MJ} \times 81.7 \frac{\text{g CO}_2}{\text{MJ H}_2} = 313,770,157 \text{ g CO}_2$$

$$\begin{aligned} \text{Total reduction emissions} &= (313,770,157 - 60,326,260) \text{ g CO}_2 \times \frac{1 \text{ t}}{10 \times 10^6 \text{ g}} \\ &= 253.44 \text{ t CO}_2 \end{aligned}$$

$$\text{Saving cost} = (3,840,516 \text{ MJ} \times 0.0034 \frac{\text{USD}}{\text{MJ H}_2}) = 13,058 \text{ USD}$$

$$\text{Total saving cost} = (13,058 - 9,068) \text{ USD} = 3,990 \text{ USD}$$

With the used of centrifugal compressor, given the purchased cost by Towler and Sinnott<sup>9</sup> with CEPCI of 532.9. Assume compressor is already available in the process plant and take the repurpose pipeline cost as capital cost. Followed to Victoria *et al.*,<sup>9</sup> the cost to repurpose pipelines is expected to be average of 22.5 % of new construction costs,

$$C_{e,\text{boiler}} = 580,000 + 20,000 \left( 90,678 \frac{\text{kg}}{\text{day}} \times \frac{1 \text{ day}}{24 \text{ hr}} \right)^{0.6} = 3,381,589 \text{ USD}$$

$$\text{Capital cost} = 3,381,589 \text{ USD} \times 0.225 = 760,858 \text{ USD}$$

$$\text{Capital cost}_{2023} = 760,858 \text{ USD} \times \left( \frac{789.2}{532.9} \right) = 1,126,795 \text{ USD}$$

$$\text{CAPEX} = 0.21 \times 1,126,795 \text{ USD} = 236,627 \frac{\text{USD}}{\text{yr}}$$

$$\text{TAC} = 236,627 \frac{\text{USD}}{\text{yr}} + (9,068 - 13,058) \frac{\text{USD}}{\text{day}} \times \frac{334 \text{ day}}{1 \text{ yr}} = -1,096,033 \frac{\text{USD}}{\text{yr}}$$

#### Strategy 4 – Water electrolysis

From Table 2, the total hydrogen required is 126,611 kg. Water electrolysis to produce hydrogen through solar energy to replace fossil-based hydrogen to reduce overall process carbon footprint. Followed to Nasser and Hassan<sup>10</sup> given that every 5.27 kg H<sub>2</sub> requires 800 W of electricity generate by the photovoltaic panel (PV),

$$\text{Electric required, } D_{\text{electric}} = 126,611 \text{ kg H}_2 \times \frac{800 \text{ W}}{5.27 \text{ kg H}_2} = 19.2 \text{ MW}$$

$$\text{Saving cost} = (126,611 \text{ kg H}_2 \times 127.06 \frac{\text{MJ}}{\text{kg}} \times 0.0034 \frac{\text{USD}}{\text{MJ H}_2}) = 54,696 \text{ USD}$$

The water cost is taken as 1.44 USD/kL,<sup>11</sup>

$$\text{Water cost} = 126,611 \text{ kg H}_2 \times \frac{1000 \text{ g}}{1 \text{ kg}} \div \frac{0.09 \text{ g H}_2}{1 \text{ L}} \times 1.44 \frac{\text{USD}}{1000 \text{ L}} = 18,232 \text{ USD}$$

$$\text{Total saving cost} = (54,696 - 18,232) \text{ USD} = 36,464 \text{ USD}$$

$$\text{Reduction emissions} = (16,087,134 \text{ MJ H}_2 \times 81.7 \frac{\text{g CO}_2}{\text{MJ H}_2}) \times \frac{1 \text{ t}}{10 \times 10^6 \text{ g}} = 1,314.32 \text{ t CO}_2$$

Followed to Lee *et al.*<sup>12</sup> the emissions from PV plant and electrolyser are 0.057 kg CO<sub>2</sub>/kW and 3.23 kg CO<sub>2</sub>/kg H<sub>2</sub>, respectively.

$$\begin{aligned} \text{CO}_2 \text{ emission} &= \left( 126,611 \text{ kg H}_2 \times 3.12 \frac{\text{kg CO}_2}{\text{kg H}_2} \right) + \left( 19.2 \text{ MW} \times \frac{1000 \text{ kW}}{\text{MW}} \times 0.057 \frac{\text{kg CO}_2}{\text{kW}} \right) \times \frac{1 \text{ t}}{1000 \text{ kg}} \\ &= 396.12 \text{ t CO}_2 \end{aligned}$$

$$\text{Total reduction emissions} = (1,314.32 - 396.12) \text{ t CO}_2 = 918.20 \text{ t CO}_2$$

Following Yates *et al.*<sup>11</sup> the installed cost of electrolyser and PV panels are 784 USD/kW and 818 USD/kW, respectively.

$$\begin{aligned} \text{Total capital cost}_{2020} &= \text{Installed cost of electrolyzer} + \text{PV} \\ &= 19.2 \text{ MW} \times 1000 \times (784 + 818) \frac{\text{USD}}{\text{kW}} = 30,758,400 \text{ USD} \end{aligned}$$

$$\text{Total capital cost}_{2023} = 30,758,400 \text{ USD} \times \left( \frac{789.2}{596.2} \right) = 40,715,413 \text{ USD}$$

$$\text{CAPEX} = 0.21 \times 40,715,413 \text{ USD} = 8,550,237 \frac{\text{USD}}{\text{yr}}$$

$$\text{TAC} = 8,550,237 \frac{\text{USD}}{\text{yr}} + (18,232 - 54,696) \frac{\text{USD}}{\text{day}} \times \frac{334 \text{ day}}{1 \text{ yr}} = -3,628,739 \frac{\text{USD}}{\text{yr}}$$

#### Strategy 5 – Waste heat recovery

From the process, the burned coke is assumed completely proceed to CO<sub>2</sub> have a discharge temperature of 977.65 K with total of 143,038 kg/day and specific heat capacity of 0.849 kJ/kg

K.<sup>13,14,15</sup> The flue gas as hot stream is heat up the water temperature to produce MP steam in a counter-current flow heat exchanger. Water with an inlet temperature of 298.15 K and assume the minimum temperature difference as 10 °C. Given the flue gas outlet temperature of 308.15 K.

*MP steam generate,  $D_{MP\ steam}$*

$$= 143,038 \text{ kg} \times (977.65 - 308.15) \text{ K} \times 0.849 \frac{\text{kJ}}{\text{kg K}} \div 1000 \frac{\text{kJ}}{\text{MJ}} = 81,304 \text{ MJ} \div 2.78 \frac{\text{MJ}}{\text{kg}}$$

$$= 29,246 \text{ kg MP steam}$$

$$\text{Saving cost} = 29,246 \text{ kg} \times 0.012 \frac{\text{USD}}{\text{kg steam}} = 351 \text{ USD}$$

$$\text{Reduction emissions} = 81,304 \text{ MJ steam} \times 75.4 \frac{\text{g CO}_2}{\text{MJ steam}} \times \frac{1 \text{ t}}{10 \times 10^6 \text{ g}} = 6.13 \text{ t CO}_2$$

Followed to Towler and Sinnott<sup>7</sup> the purchase cost of heat exchanger can be calculated with a required heat transfer area of 90.29 m<sup>2</sup> calculated by using algebraic approach,

$$\text{Cost of heat exchanger (stainless steel)} = [28,000 + 54(90.29)^{1.2}]1.3 = 39,999 \text{ USD}$$

$$\text{Capital cost}_{2010} = 39,999 \text{ USD}(1 + 0.8 + 0.3 + 0.3 + 0.2 + 0.3 + 0.2 + 0.1)$$

$$\text{Capital cost}_{2023} = 127,998 \text{ USD} \times \left(\frac{789.2}{532.9}\right) = 189,559 \text{ USD}$$

$$\text{CAPEX} = 0.21 \times 189,559 \text{ USD} = 39,807 \frac{\text{USD}}{\text{yr}}$$

$$\text{TAC} = 39,807 \frac{\text{USD}}{\text{yr}} - 351 \frac{\text{USD}}{\text{day}} \times \frac{334 \text{ day}}{1 \text{ yr}} = -77,427 \frac{\text{USD}}{\text{yr}}$$

The utility cost used in every reduction strategy is summarised in Table S5 and the parameters of the cogeneration system is shown in Table S6.

Table S5: Utility costs

| Utility           | Heating Value | Unit   | Source                             |
|-------------------|---------------|--------|------------------------------------|
| MD-pressure steam | 2.78          | MJ/kg  | Koretsky <sup>16</sup>             |
| HP-pressure steam | 3.26          | MJ/kg  |                                    |
| Natural gas       | 47.14         | MJ/kg  | Abella <i>et al.</i> <sup>14</sup> |
| Hydrogen          | 127.06        | MJ/kg  |                                    |
| Biomass           | 16.14         | MJ/kg  | Susanto <i>et al.</i> <sup>4</sup> |
| Water             | 1.44          | USD/kL | Yates <i>et al.</i> <sup>11</sup>  |

Table S6: Cogeneration parameter used

| System        | Power-to-heat ratio | Efficiency | Source                             |
|---------------|---------------------|------------|------------------------------------|
| NG-CHP        | 1.1                 | 69.0%      |                                    |
| Steam turbine | 0.13                | 79.6%      | Abella <i>et al.</i> <sup>14</sup> |

## Case Study 2:

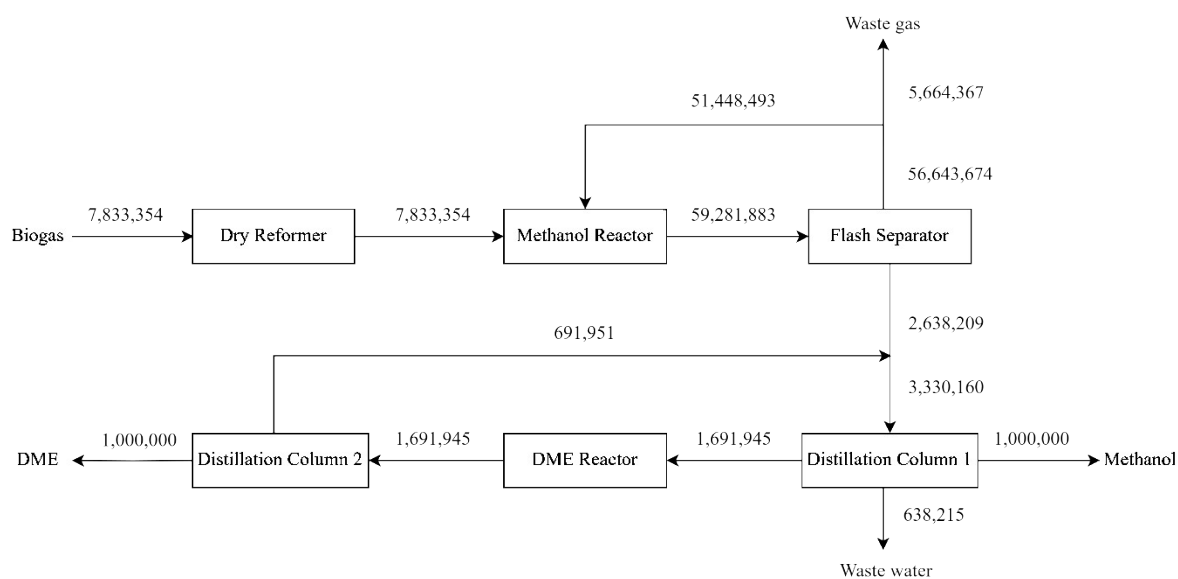

Figure S2: Block diagram of the methanol production case study (numerical values are mass flowrates expressed in kg per day)

Table S7: Methanol process energy flow

| Process Energy        | Power consumption | Total Natural Gas requirement | Medium-pressure steam | Refrigerant requirement | Cooling water     |
|-----------------------|-------------------|-------------------------------|-----------------------|-------------------------|-------------------|
| Process Unit          | MJ/day            | kg/day                        | kg/day                | kg/day                  | kg/day            |
| Dry reformer          | 562,948           | 752,372                       | -                     | -                       | -                 |
| Methanol reactor      | 47,836,375        | -                             | -                     | -                       | 16,648,823        |
| Flash separator       | -                 | -                             | 1,031,605             | 62,191,082              | -                 |
| Distillation column 1 | 171               | -                             | 9,272,483             | 671,007                 | 9,587,757         |
| DME reactor           | -                 | 57,348                        | -                     | -                       | 173,881           |
| Distillation column 2 | 409,612           | -                             | 214,308               | -                       | 1,161,134         |
| <b>Total</b>          | <b>48,809,106</b> | <b>809,720</b>                | <b>10,518,396</b>     | <b>62,862,089</b>       | <b>27,571,596</b> |

Table S8: Methanol process CO<sub>2</sub> emissions

| Process CO <sub>2</sub> Emissions | Power consumption        | Total Natural Gas requirement | Medium-pressure steam    | Refrigerant requirement  | Cooling water            |
|-----------------------------------|--------------------------|-------------------------------|--------------------------|--------------------------|--------------------------|
| Process Unit                      | t CO <sub>2eq</sub> /day | t CO <sub>2eq</sub> /day      | t CO <sub>2eq</sub> /day | t CO <sub>2eq</sub> /day | t CO <sub>2eq</sub> /day |
| Dry reformer                      | 104.03                   | 2,454.30                      | -                        | -                        | -                        |
| Methanol reactor                  | 8,840.16                 | -                             | -                        | -                        | 3,299.92                 |
| Flash separator                   | -                        | -                             | 212.35                   | 382.51                   | -                        |
| Distillation column 1             | 0.03                     | -                             | 1,908.67                 | 4.13                     | 1,900.37                 |
| DME reactor                       | -                        | 187.08                        | -                        | -                        | 34.46                    |
| Distillation column 2             | 75.70                    | -                             | 44.11                    | -                        | 230.15                   |
| <b>Total</b>                      | <b>9,019.92</b>          | <b>2,641.38</b>               | <b>2,165.13</b>          | <b>386.64</b>            | <b>5,464.90</b>          |

Table S9: Methanol process shared and dedicated facilities

| Shared facility       | Dedicated facility    |
|-----------------------|-----------------------|
| Dry reformer          |                       |
| Methanol reactor      | DME reactor           |
| Flash separator       | Distillation column 2 |
| Distillation column 1 |                       |

### Case 1 – Heat Integration

Through P-HENS, the optimal heat exchanger network is provided, achieving natural gas and cooling water savings by utilised 3 heat exchangers.

$$\text{Saving NG} = 13,518,346.85 \text{ MJ}$$

$$\text{Saving cooling water (CW)} = 14,259,175.50 \text{ MJ}$$

$$\text{Saving cost} = \text{Saving NG \& CW}$$

$$= \left( 13,518,346.85 \text{ MJ} \times 0.00265 \frac{\text{USD}}{\text{MJ}} \right) + \left( 14,259,175.50 \text{ MJ} \times 0.00054 \frac{\text{USD}}{\text{MJ}} \right) = 43,649.24 \text{ USD}$$

Reduction emissions

$$= \left[ \left( 13,518,346.85 \text{ MJ} \times 69.2 \frac{\text{g CO}_2}{\text{MJ NG}} \right) + \left( 14,259,175.50 \text{ MJ} \times 77.73 \frac{\text{g CO}_2}{\text{MJ CW}} \right) \right] \frac{1 \text{ t}}{10 \times 10^6 \text{ g}}$$

$$= 2,043.81 \text{ t CO}_2$$

Using an algebraic approach, the required heat transfer areas for the three heat exchangers were calculated as 89,359.77 m<sup>2</sup>, 1,607.80 m<sup>2</sup>, and 4,861.62 m<sup>2</sup>.

$$\text{Cost of heat exchanger (stainless steel)} = [28,000 + 54(89,359.77)^{1.2}] = 47,208,680.45 \text{ USD}$$

$$\text{Total cost of heat exchanger} = (47,208,680.45 + 408,076.27 + 1,461,938.85) \text{ USD} = 49.08 \text{ M USD}$$

$$\text{Capital cost}_{2010} = 49.08 \text{ M USD} (1 + 0.8 + 0.3 + 0.3 + 0.2 + 0.3 + 0.2 + 0.1)$$

$$\text{Capital cost}_{2023} = 157.05 \text{ M USD} \times \left( \frac{789.2}{532.9} \right) = 234.33 \text{ M USD}$$

$$\text{CAPEX} = 0.21 \times 234.33 \text{ M USD} = 49.21 \frac{\text{M USD}}{\text{yr}}$$

$$\text{TAC} = 49.21 \frac{\text{USD}}{\text{yr}} - 43,649.24 \frac{\text{USD}}{\text{day}} \times \frac{334 \text{ day}}{1 \text{ yr}} = 34.63 \frac{\text{M USD}}{\text{yr}}$$

## Case 2 – Compressor ratio

A case study was conducted using Aspen HYSYS, which determined the optimal compressor ratio that utilised the least amount of energy.

$$\text{Saving electric} = 3,372,699.29 \text{ MJ}$$

$$\text{Saving CW} = 2,780,434.90 \text{ MJ}$$

$$\text{NG required} = 1,412,108.06 \text{ MJ}$$

$$\text{Saving cost} = \text{Saving electric \& CW} - \text{NG required}$$

$$= \left( 3,372,699.29 \text{ MJ} \times 0.028 \frac{\text{USD}}{\text{MJ}} \right) + \left( 2,780,434.90 \text{ MJ} \times 0.00054 \frac{\text{USD}}{\text{MJ}} \right) - \left( 1,412,108.06 \text{ MJ} \times 0.00054 \frac{\text{USD}}{\text{MJ}} \right)$$

$$= 91,445.44 \text{ USD}$$

$$\text{Reduction emissions}$$

$$= \left[ \left( 3,372,699.29 \text{ MJ} \times 184.8 \frac{\text{g CO}_2}{\text{MJ}} \right) + \left( 2,780,434.90 \text{ MJ} \times 77.73 \frac{\text{g CO}_2}{\text{MJ CW}} \right) \right] - \left( 1,412,108.06 \text{ MJ} \times 184.8 \frac{\text{g CO}_2}{\text{MJ}} \right)$$

$$\frac{1 \text{ t}}{10 \times 10^6 \text{ g}} = 741.68 \text{ t CO}_2$$

To achieve the desired process conditions, four compressors are required, with energy demands of 28,161.05 kW, 28,173.73 kW, 28,213.55 kW, and 28,213.55 kW.

$$\text{Cost of compressor} = [580,000 + 20,000(28,161.05)^{0.6}] = 9,930,165.30 \text{ USD}$$

$$\text{Total cost of compressor} = (9,930,165.30 + 9,932,691.57 + 9,940,622.17 + 9,940,622.17) \text{ USD} = 39.74 \text{ M USD}$$

$$\text{Capital cost}_{2010} = 39.74 \text{ M USD} (1 + 0.8 + 0.3 + 0.3 + 0.2 + 0.3 + 0.2 + 0.1)$$

$$\text{Capital cost}_{2023} = 127.18 \text{ M USD} \times \left( \frac{789.2}{532.9} \right) = 189.76 \text{ M USD}$$

$$\text{CAPEX} = 0.21 \times 234.33 \text{ M USD} = 39.85 \frac{\text{M USD}}{\text{yr}}$$

$$\text{TAC} = 39.85 \frac{\text{M USD}}{\text{yr}} - 91,445.44 \frac{\text{USD}}{\text{day}} \times \frac{334 \text{ day}}{1 \text{ yr}} = 9.31 \frac{\text{M USD}}{\text{yr}}$$

### Case 3 – Recycle ratio

A case study was conducted using Aspen HYSYS, which determined the optimal recycle ratio that utilised the least amount of energy.

$$\text{Saving electric} = 20,884,050.22 \text{ MJ}$$

$$\text{Saving steam} = 1,858,019.61 \text{ MJ}$$

$$\text{Saving CW} = 4,026,529.19 \text{ MJ}$$

$$\text{Saving refrigerant} = 16,024,943.89 \text{ MJ}$$

$$\text{NG required} = 7,136,376.45 \text{ MJ}$$

*Saving cost*

$$\begin{aligned} &= \left( 20,884,050.22 \text{ MJ} \times 0.028 \frac{\text{USD}}{\text{MJ}} \right) + \left( 1,858,019.61 \text{ MJ} \times 0.0044 \frac{\text{USD}}{\text{MJ}} \right) + \left( 4,026,529.19 \text{ MJ} \times 0.0008 \frac{\text{USD}}{\text{MJ}} \right) \\ &+ \left( 16,024,943.89 \text{ MJ} \times 0.80 \frac{\text{USD}}{\text{MJ}} \right) - \left( 7,136,376.45 \text{ MJ} \times 0.00265 \frac{\text{USD}}{\text{MJ}} \right) = 13,346,277.36 \text{ USD} \end{aligned}$$

Reducing the recycle ratio requires an additional 1,579,610.75 kg of raw material (biogas).

$$\text{Cost of biogas} = 1,579,610.75 \text{ kg} \times 0.16 \frac{\text{USD}}{\text{kg}} = 258,266.36 \text{ USD}$$

$$\text{Net saving} = 13,346,277.36 - 258,266.36 \text{ USD} = 13,088,011.01 \text{ USD}$$

*Reduction emissions*

$$\begin{aligned} &= \left[ \left( 20,884,050.22 \text{ MJ} \times 184.8 \frac{\text{g CO}_2}{\text{MJ}} \right) + \left( 1,858,019.61 \text{ MJ} \times 75.4 \frac{\text{g CO}_2}{\text{MJ}} \right) + \left( 4,026,529.19 \text{ MJ} \times 0.0008 \frac{\text{g CO}_2}{\text{MJ}} \right) + \left( 16,024,943.89 \text{ MJ} \times 0.80 \frac{\text{g CO}_2}{\text{MJ}} \right) - \left( 7,136,376.45 \text{ MJ} \times 0.00265 \frac{\text{g CO}_2}{\text{MJ}} \right) \right] \\ &\frac{1 \text{ t}}{10 \times 10^6 \text{ g}} = 4,010.26 \text{ t CO}_2 \end{aligned}$$

Assume compressor is already available in the process plant and take the repurpose pipeline cost as capital cost. Followed to Victoria *et al.*,<sup>9</sup> the cost to repurpose pipelines is expected to be average of 22.5 % of new construction costs,

$$C_{e,boiler} = 580,000 + 20,000(128226.10)^{0.6} = 23,797,521.07 \text{ USD}$$

$$\text{Capital cost} = 3,381,589 \text{ USD} \times 0.225 = 5.35 \text{ M USD}$$

$$\text{Capital cost}_{2023} = 5.35 \text{ M USD} \times \left( \frac{789.2}{532.9} \right) = 7.99 \text{ M USD}$$

$$\text{CAPEX} = 0.21 \times 7.99 \text{ M USD} = 1.68 \frac{\text{M USD}}{\text{yr}}$$

$$\text{TAC} = 1.68 \text{ M} \frac{\text{USD}}{\text{yr}} + 13,088,011.01 \frac{\text{USD}}{\text{day}} \times \frac{334 \text{ day}}{1 \text{ yr}} = -4,369.72 \frac{\text{M USD}}{\text{yr}}$$



#### Case 4 – Heat integration with recycle ratio

$$\text{Saving NG} = 45,111,284.15 \text{ MJ}$$

$$\text{Saving CW} = 16,523,859.94 \text{ MJ}$$

$$\text{Saving refrigerent} = 149,034.54 \text{ MJ}$$

*Saving cost*

$$\begin{aligned} &= \left( 45,111,284.15 \text{ MJ} \times 0.00265 \frac{\text{USD}}{\text{MJ}} \right) + \left( 16,523,859.94 \text{ MJ} \times 0.00054 \frac{\text{USD}}{\text{MJ}} \right) + \left( 149,034.54 \text{ MJ} \times 0.000001 \frac{\text{USD}}{\text{MJ}} \right) \\ &= 254,733.60 \text{ USD} \end{aligned}$$

*Reduction emissions*

$$\begin{aligned} &= \left[ \left( 45,111,284.15 \times 69.2 \frac{\text{g CO}_2}{\text{MJ NG}} \right) + \left( 16,523,859.94 \text{ MJ} \times 77.73 \frac{\text{g CO}_2}{\text{MJ CW}} \right) + \left( 149,034.54 \text{ MJ} \times 0.000001 \frac{\text{g CO}_2}{\text{MJ}} \right) \right] \\ &\frac{1 \text{ t}}{10 \times 10^6 \text{ g}} = 4,535.80 \text{ t CO}_2 \end{aligned}$$

Using an algebraic approach, the required heat transfer areas for the four heat exchangers were calculated as 136,070.11 m<sup>2</sup>, 10,010.73 m<sup>2</sup>, 2,639.59 m<sup>2</sup>, and 168.78 m<sup>2</sup>.

$$\text{Cost of heat exchanger (stainless steel)} = [28,000 + 54(136,070.11)^{1.2}] = 78,174,411.62 \text{ USD}$$

$$\begin{aligned} \text{Total cost of heat exchanger} \\ &= (78,174,411.62 + 3,439,555.69 + 717,027.98 + 53,419.93) \text{ USD} = 82.38 \text{ M USD} \end{aligned}$$

$$\text{Capital cost}_{2010} = 82.38 \text{ M USD} (1 + 0.8 + 0.3 + 0.3 + 0.2 + 0.3 + 0.2 + 0.1)$$

$$\text{Capital cost}_{2023} = 263.63 \text{ M USD} \times \left( \frac{789.2}{532.9} \right) = 393.34 \text{ M USD}$$

$$\text{CAPEX} = 0.21 \times 393.34 \text{ M USD} = 82.60 \frac{\text{M USD}}{\text{yr}}$$

$$\text{TAC} = 82.60 \frac{\text{M USD}}{\text{yr}} - 254,733.60 \frac{\text{USD}}{\text{day}} \times \frac{334 \text{ day}}{1 \text{ yr}} = -2.48 \frac{\text{M USD}}{\text{yr}}$$

## Case 5 – Changing compressor ratio with recycle ratio

$$\text{Saving electric} = 5,037,977.29 \text{ MJ}$$

$$\text{Saving CW} = 3,341,114.93 \text{ MJ}$$

$$\text{Steam required} = 1,696,862.36 \text{ MJ}$$

*Saving cost*

$$\begin{aligned} &= \left( 5,037,977.29 \text{ MJ} \times 0.028 \frac{\text{USD}}{\text{MJ}} \right) + \left( 3,341,114.93 \text{ MJ} \times 0.00054 \frac{\text{USD}}{\text{MJ}} \right) - \left( 1,696,862.36 \text{ MJ} \times 0.00054 \frac{\text{USD}}{\text{MJ}} \right) \\ &= 134,289.28 \text{ USD} \end{aligned}$$

*Reduction emissions*

$$\begin{aligned} &= \left[ \left( 5,037,977.29 \text{ MJ} \times 184.8 \frac{\text{g CO}_2}{\text{MJ}} \right) + \left( 3,341,114.93 \text{ MJ} \times 77.73 \frac{\text{g CO}_2}{\text{MJ CW}} \right) - \left( 1,696,862.36 \text{ MJ} \times 77.73 \frac{\text{g CO}_2}{\text{MJ CW}} \right) \right] \\ &\quad \frac{1 \text{ t}}{10 \times 10^6 \text{ g}} = 1,062.77 \text{ t CO}_2 \end{aligned}$$

To achieve the process conditions, four compressors are required, with energy demands of 33,839.78 kW, 33,855.02 kW, 33,902.88 kW, and 22,500.48 kW.

$$\text{Cost of compressor} = [580,000 + 20,000(33,839.78)^{0.6}] = 11,019,663.46 \text{ USD}$$

$$\begin{aligned} \text{Total cost of compressor} \\ &= (11,019,663.46 + 11,022,484.10 + 11,031,338.79 + 8,752,315.30) \text{ USD} = 41.83 \text{ M USD} \end{aligned}$$

$$\text{Capital cost}_{2010} = 41.83 \text{ M USD} (1 + 0.8 + 0.3 + 0.3 + 0.2 + 0.3 + 0.2 + 0.1)$$

$$\text{Capital cost}_{2023} = 133.84 \text{ M USD} \times \left( \frac{789.2}{532.9} \right) = 199.70 \text{ M USD}$$

$$\text{CAPEX} = 0.21 \times 199.70 \text{ M USD} = 41.94 \frac{\text{M USD}}{\text{yr}}$$

$$\text{TAC} = 41.94 \frac{\text{M USD}}{\text{yr}} - 134,289.28 \frac{\text{USD}}{\text{day}} \times \frac{334 \text{ day}}{1 \text{ yr}} = -2.92 \frac{\text{M USD}}{\text{yr}}$$

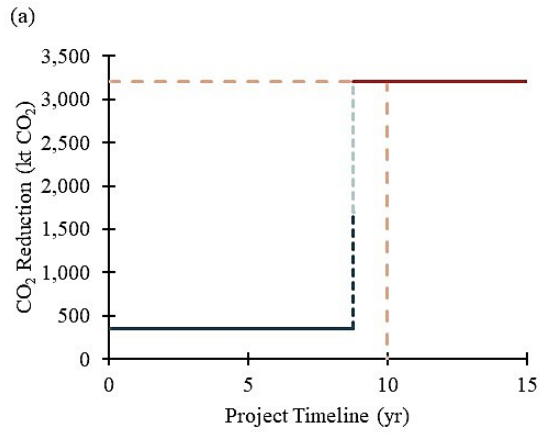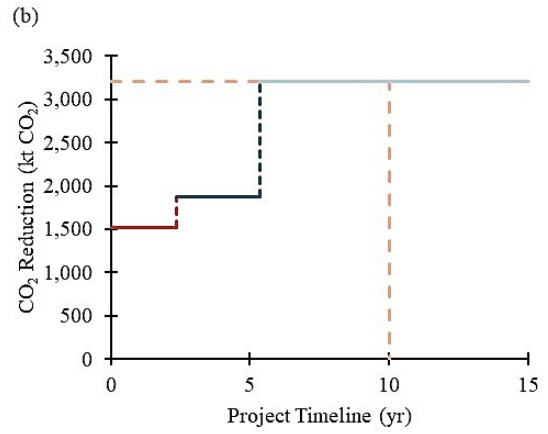

Figure S3: Targeted CO<sub>2</sub> reduction and complete in 10 years in Option 2 a) Result on Figure 17(c), and b) Result on Figure 17(e)

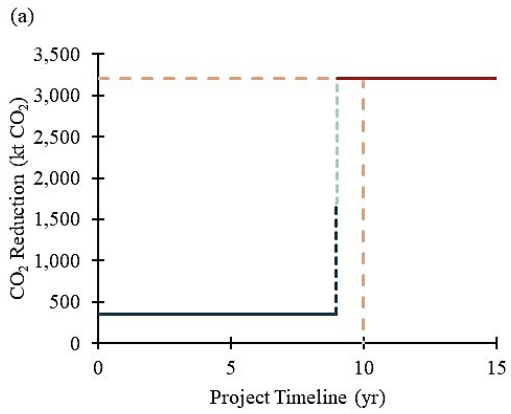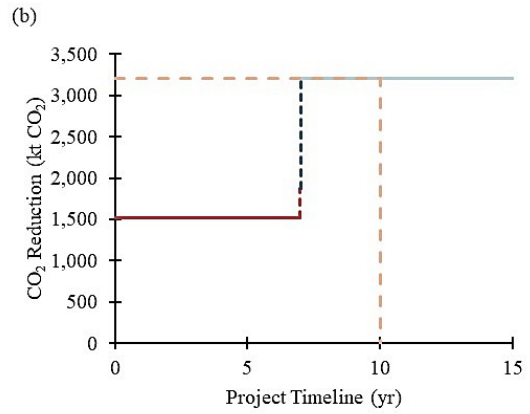

Figure S4: Targeted CO<sub>2</sub> reduction and complete in 10 years on Option 3 a) Result on Figure 18(c), and b) Result on Figure 18(e)

## References

1. Epa, Catalog of CHP technologies introduction to CHP technologies, <https://nepis.epa.gov/Exe/ZyPDF.cgi/P1010ZR1.PDF?Dockey=P1010ZR1.PDF>, (accessed September 2023).
2. Towering Skills, Cost indices, <https://toweringskills.com/financial-analysis/cost-indices/>, (accessed October 2023).
3. G. Towler and R.A. Sinnott, Principles, practice and economics of plant and process design, Chemical Engineering Design, 2008, 2.
4. H. Susanto, T. Suria and S.H. Pranolo, IOP Publishing, 2018, 334, 1, 012012.
5. EPA, Overview of CHP technologies, [https://betterbuildingssolutioncenter.energy.gov/sites/default/files/attachments/Overview\\_of\\_CHP\\_Technologies.pdf](https://betterbuildingssolutioncenter.energy.gov/sites/default/files/attachments/Overview_of_CHP_Technologies.pdf), (accessed September 2023).
6. EPA, Catalog of CHP technologies. National Service Center for Environmental Publications (NSCEP), [https://www.epa.gov/sites/default/files/2015-07/documents/catalog\\_of\\_chp\\_technologies.pdf](https://www.epa.gov/sites/default/files/2015-07/documents/catalog_of_chp_technologies.pdf), (accessed September 2023).
7. G. Towler and R. Sinnott, Chemical Engineering Design: Principles, Practice and Economics of Plant and Process Design, 2013, 5.
8. I.A. Richardson, J.T. Fisher, J.W. Leachman, P.E. Frome, B.O. Smith, S. Guo, S. Chanda, M.S. McFeely and A.M. Miller, Economics Faculty Publications, 2015, 15.
9. PE Media Network, Repurposing pipelines for hydrogen transportation, <https://pemedianetwork.com/hydrogen-economist/articles/strategies-trends/2023/repurposing-pipelines-for-hydrogen-transportation/>, (accessed November 2023).
10. M. Nasser and H. Hassan, Sustainable Energy Technologies and Assessments, 2023, 60, 103424.
11. J. Yates, R. Daiyan, R. Patterson, R. Egan, R. Amal, A. Ho-Baille and N.L. Chang, Cell Reports Physical Science, 2020, 1, 10.
12. H. Lee, B. Choe, B. Lee, J. Gu, H.S. Cho, W. Won and H. Lim, Journal of Cleaner Production, 2022, 377, 134210.
13. R. Sadeghbeigi, Chapter 1-Fluid catalytic cracking process description—converter section, Fluid Catalytic Cracking Handbook, 2020, 1-22.
14. UCalgary, Petroleum refinery life cycle inventory model (PRELIM) PRELIM v1.4., <https://www.ucalgary.ca/sites/default/files/teams/477/prelim-v1.4-documentation.pdf>, (accessed August 2023).
15. The Engineering Toolbox, Carbon dioxide – thermophysical properties, [https://www.engineeringtoolbox.com/CO2-carbon-dioxide-properties-d\\_2017.html](https://www.engineeringtoolbox.com/CO2-carbon-dioxide-properties-d_2017.html), (accessed April 2024).
16. M.D. Koretsky, Engineering and chemical thermodynamics, John Wiley & Sons, 2012 Dec 17.
